# Supplementary material for: Bifunctional luminescent superparamagnetic nanocomposites of CdSe/CdS-Fe3O4 synthesized via a facile method
Source: Royal Society of Chemistry journal article supplement (doi:10.1039/c2jm16783b), 2012-01-01
Supplement: c2jm16783b.pdf [file c2jm16783b.pdf]

## Supporting Information

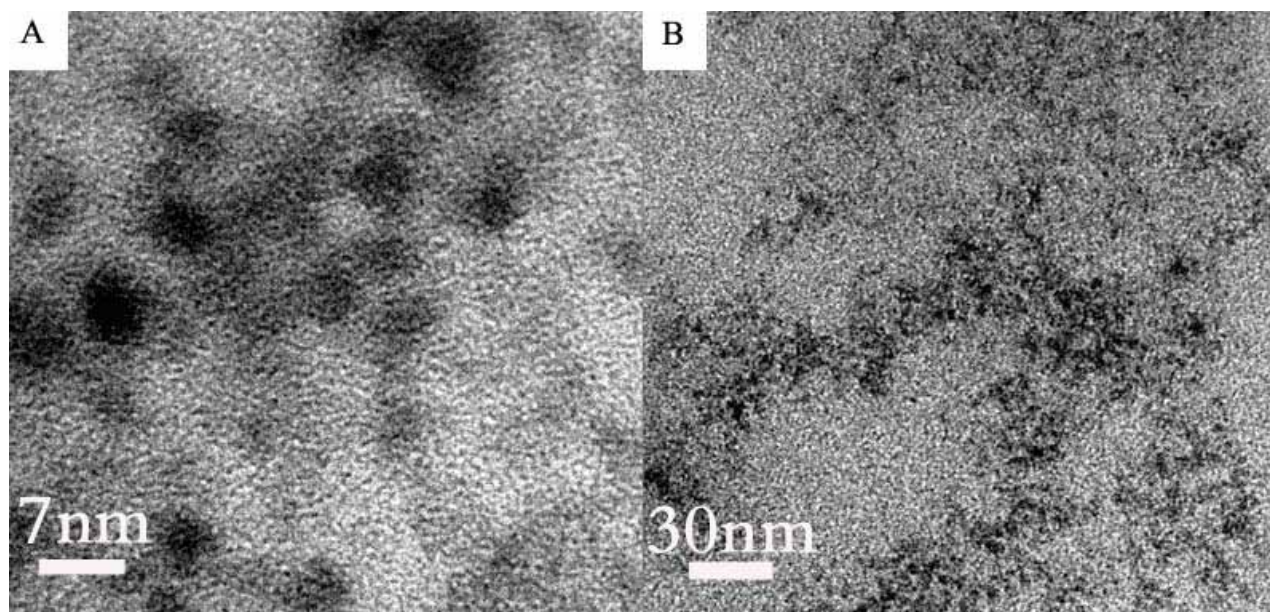

**Figure S1.** TEM images of Fe<sub>3</sub>O<sub>4</sub>-CdSe/CdS nanocomposites placed for 16 weeks.

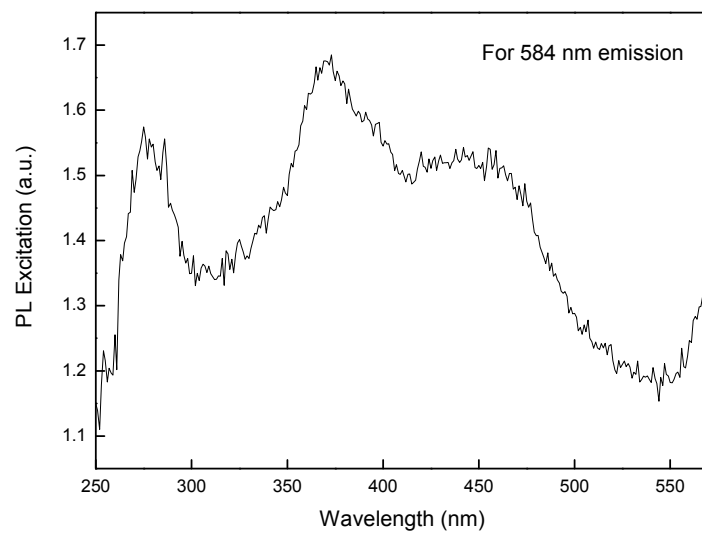

**Figure S2.** The photoluminescence excitation spectrum of the CdSe/CdS-Fe<sub>3</sub>O<sub>4</sub> nanocomposites for the 584 nm emission.
